# Supplementary material for: Decreased renal function increases the nighttime urine volume rate by carryover of salt excretion to the nighttime
Source: Research Square preprint supplement (doi:10.21203/rs.3.rs-251676/v1), 2021-03-03
Supplement: Supplementary file 1 [file 348e45798b04509530b7fa22.xlsx]

## Sheet: Sheet1
Table 1. Characteristics of the subjects (n = 49)
Median Age, years (Range)	64	(39−89)
No. Male (%)	24	(49)
No. Reasons for nephrectomy (%)
Kidney transplant donor	36	(73)
Renal cancer	11	(22)
Renal pelvis cancer	2	(4)
Median Operative time, min (Range)	210	(123−374)
Median Blood loss, mL (Range)	20	(0−140)
No. Comorbidities (%)
Hypertension	17	(35)
Dyslipidemia	6	(12)
Diabetes mellitus	3	(6)
Cerebrovascular disease	2	(4)
Malignant tumors	2	(4)
